# Supplementary material for: Soluble CD13 is a potential mediator of neutrophil-induced thrombogenic inflammation in SARS-CoV-2 infection
Source: JCI journal article supplement (doi:10.1172/jci.insight.184975), 2025-04-01
Supplement: sd1 [file 1]

**Supplemental Files for CD13-COVID-19 manuscript**

**Supplemental Figure 1.** Comparison of male and female patients hospitalized for COVID-19. **(A)** sCD13 levels in male and female patients. The correlation was stronger in male patients with parameters of inflammation **(B)** and markers for NETosis **(C)**. Results are expressed as mean  $\pm$  SD in (A) and  $p < 0.05$  was considered significant.

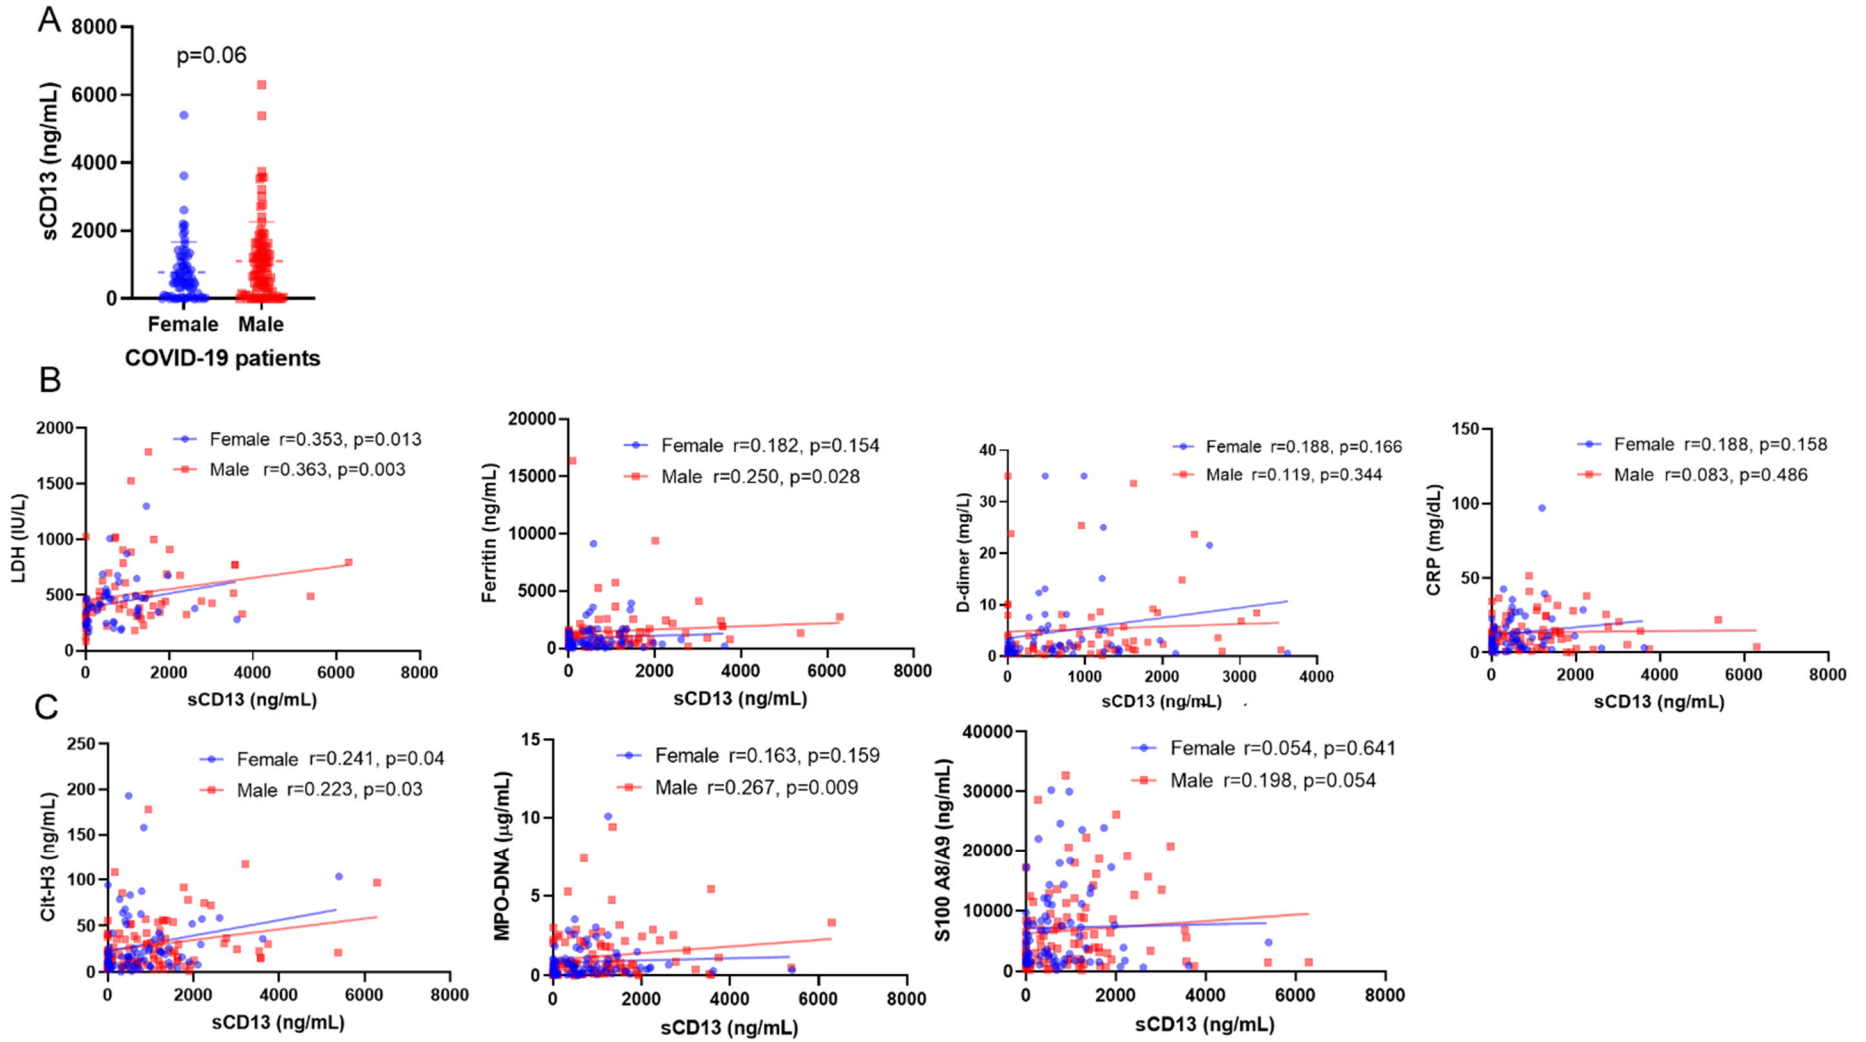

**Supplemental Figure 2.** A negative correlation between sCD13 and age was found in both healthy controls and COVID-19 patients.

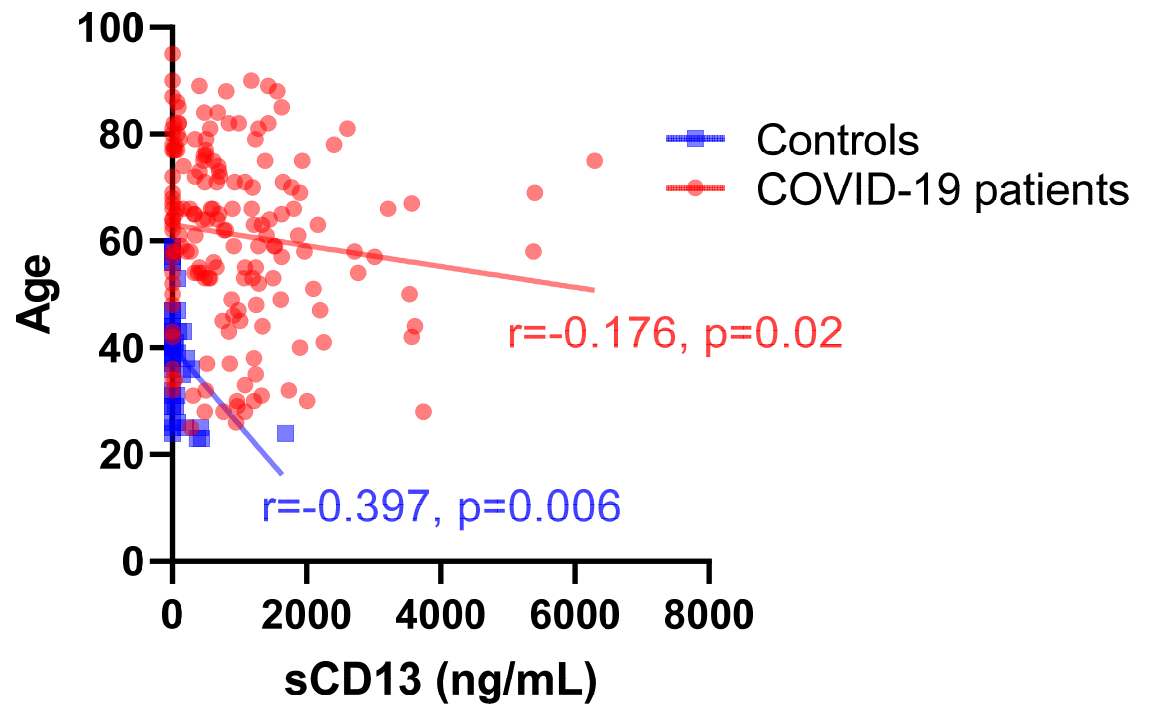

**Supplemental Figure 3.** The levels of serum sCD13 were similar among patients with different clinical outcomes, including death or discharged. Status “unknown” indicates absence of follow-up information. Results are expressed as mean  $\pm$  SD.

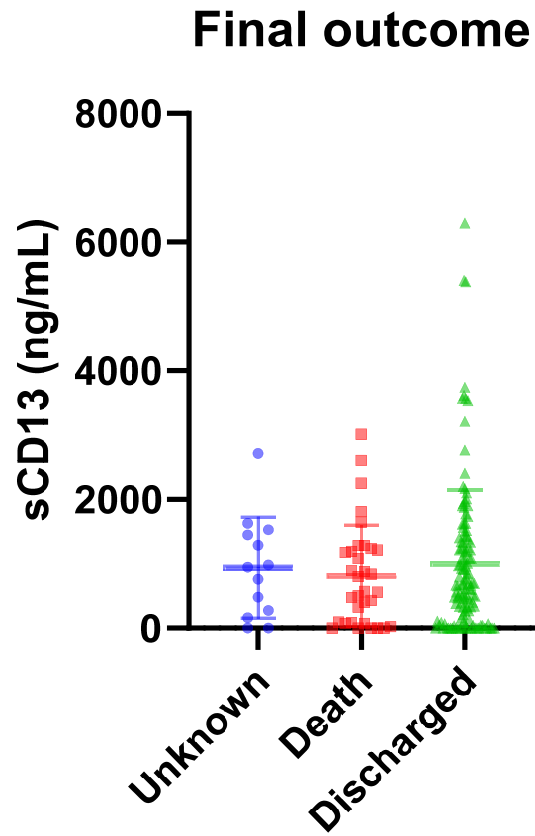

**Supplemental Figure 4.** Serum sCD13 levels in black patients with COVID-19 showed stronger correlation with inflammatory factors (**A**) compared to white patients, while levels from white patients showed stronger correlation with NETosis markers compared to black patients (**B**).

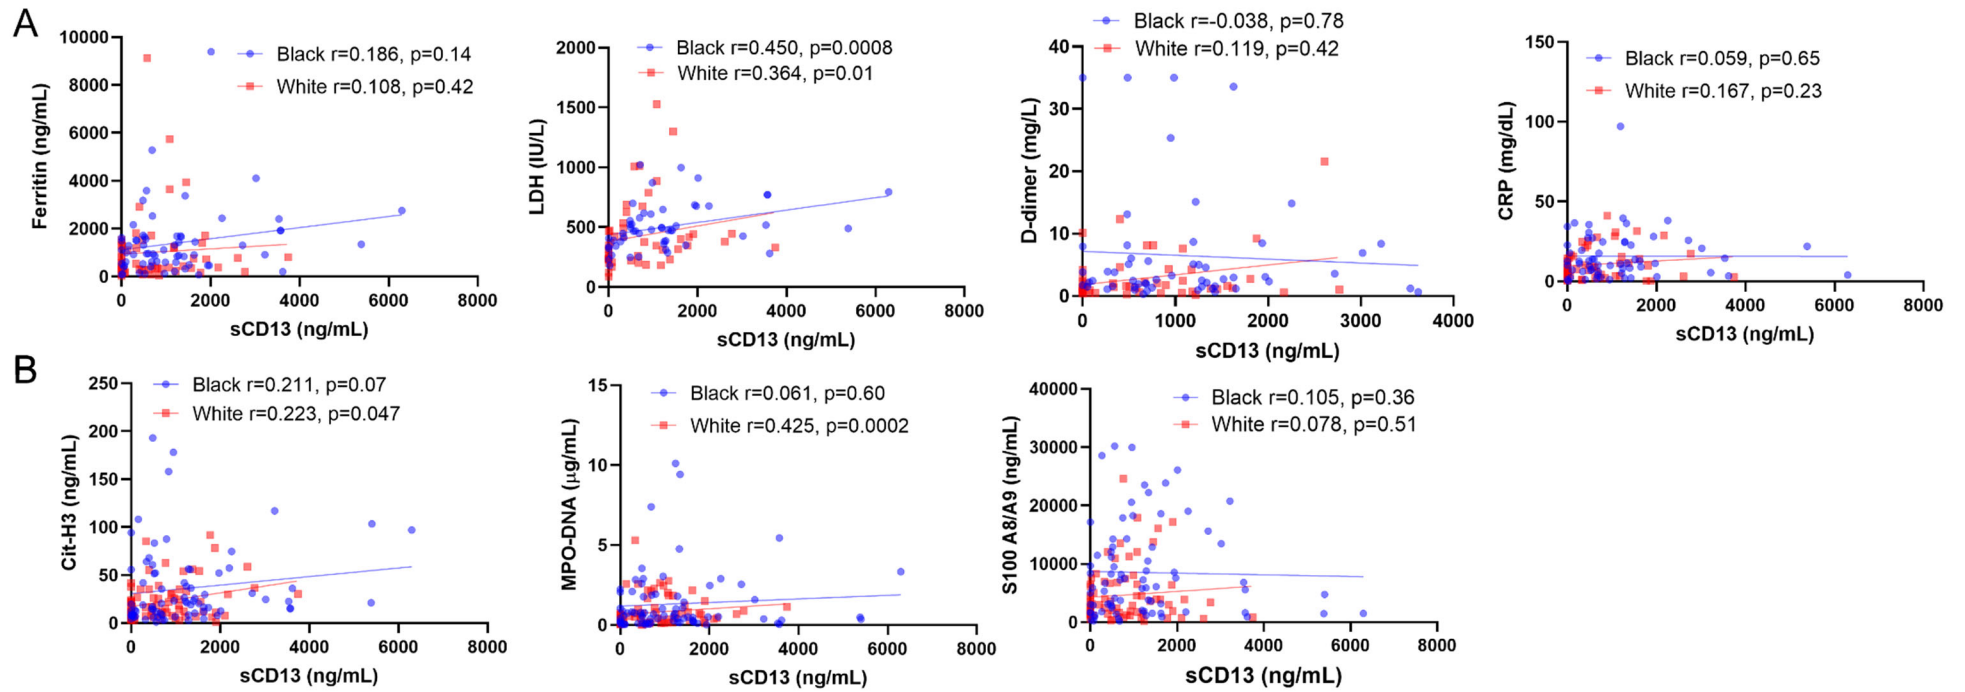

**Supplemental Figure 5.** Serum sCD13 levels in patients with COVID-19 (with Omicron variant) showed strong correlation with inflammatory cytokines.

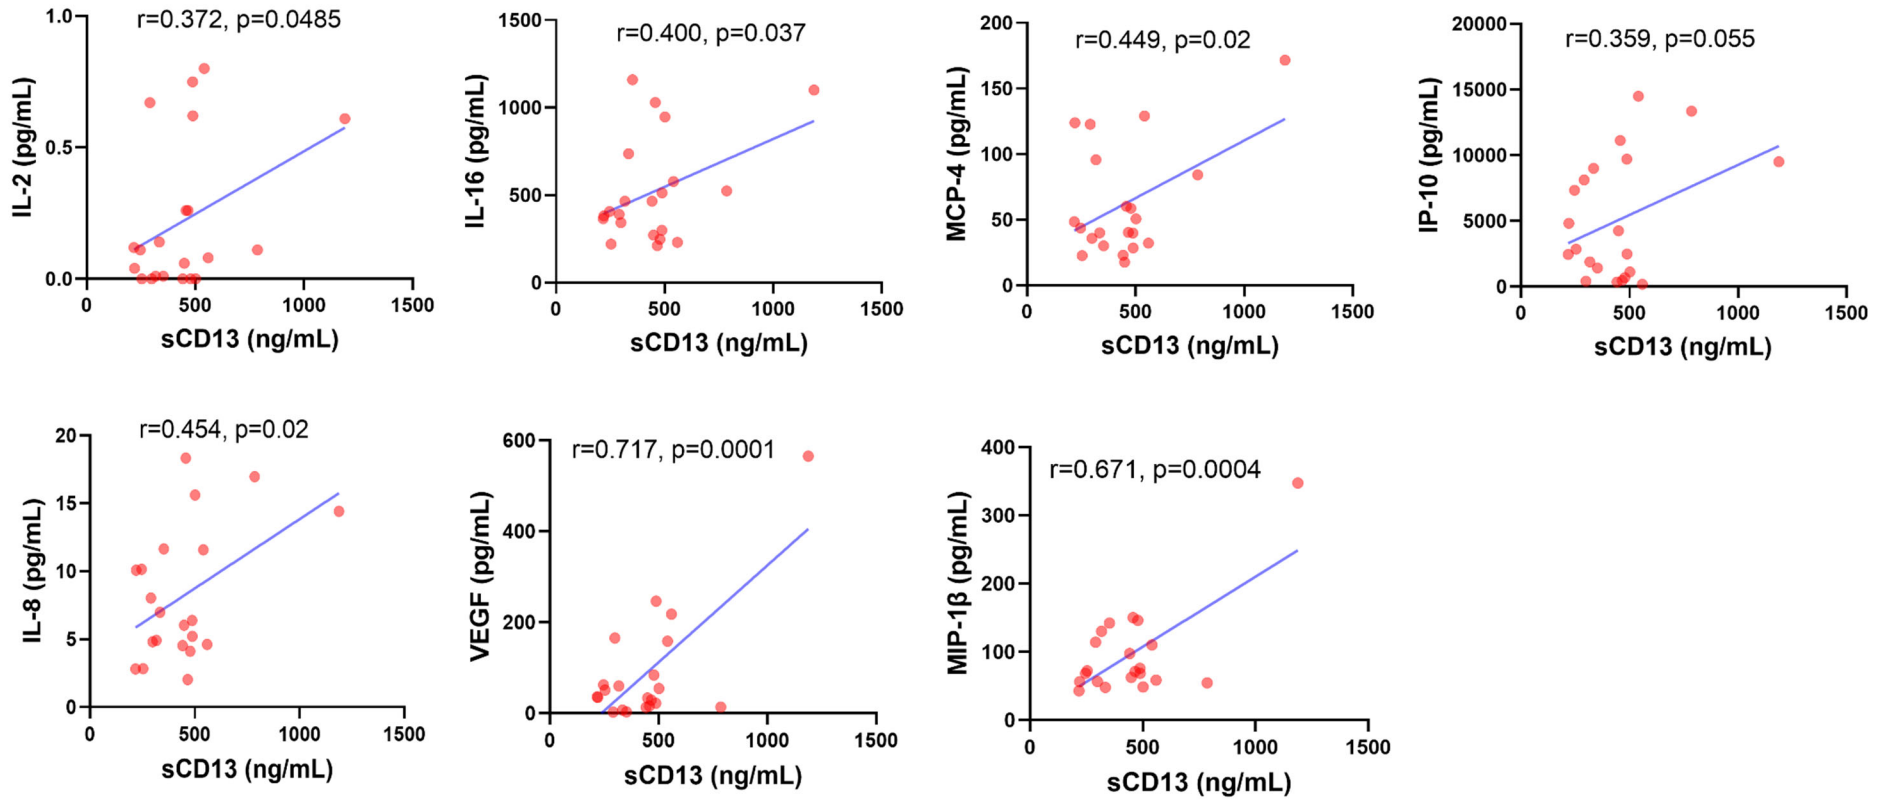

**Supplemental Figure 6.** Serum sCD13 levels in sepsis patients showed elevated levels of sCD13 compared to controls (A). sCD13 did not correlate with cit-H3 or S100A8/A9 levels in this cohort (B). Results are expressed as mean +/- SD.

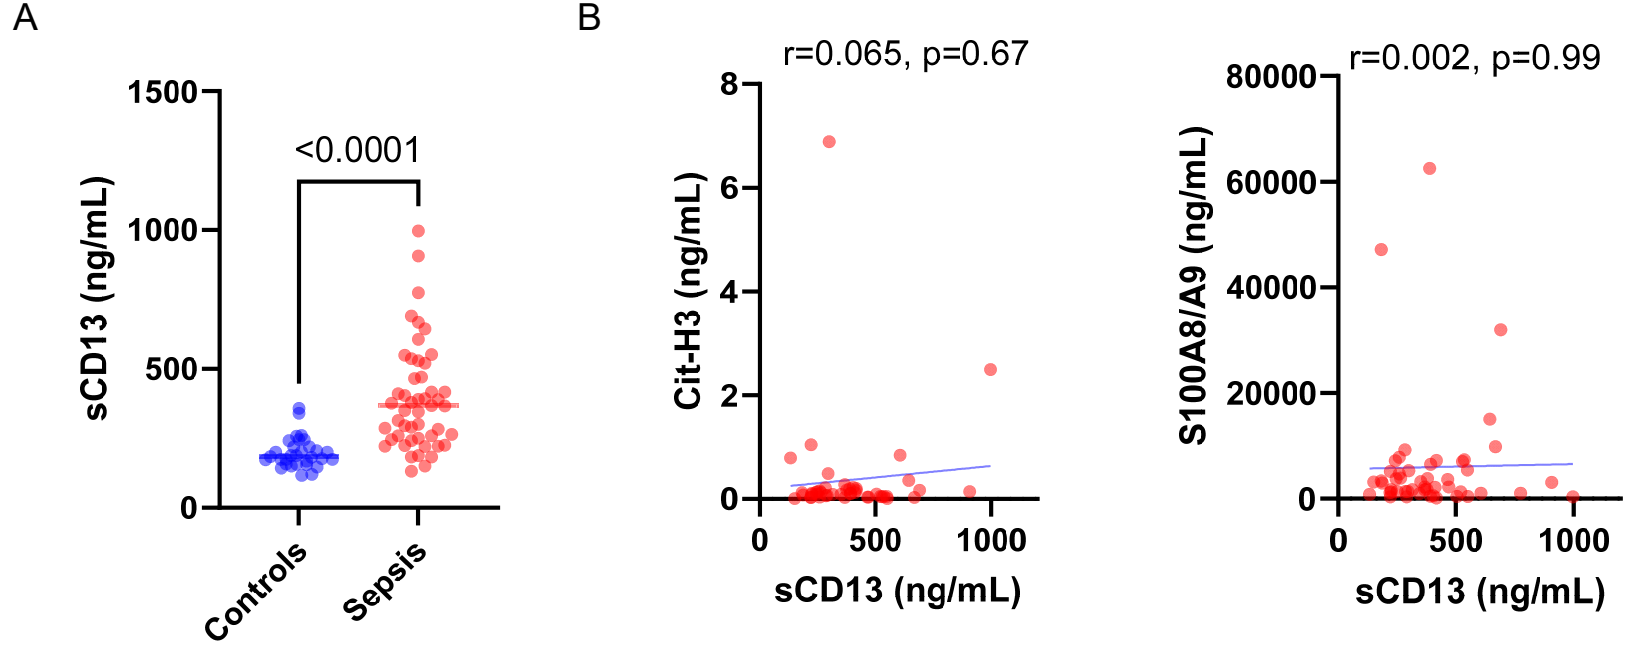

**Supplemental Figure 7.** sCD13 promotes neutrophil NETosis and chemotaxis but not platelet aggregation. sCD13 induced NETosis as quantified using the cell-impermeant dye SYTOX Green or nuclease-liberated MPO activity. Phorbol 12-myristate 13-acetate (PMA) was used as a positive control (A). Treating neutrophils with both inhibitors showed an additive effect on sCD13-induced NETosis (B). sCD13 dose-dependently induced neutrophil chemotaxis compared to PBS control using a modified Boyden chamber. IL-8 was used as a positive control (C). In a separate experiment, neutrophil chemotaxis was measured using IncuCyte®. sCD13 induced neutrophil chemotaxis was blocked consistently by PAR4 inhibitor BMS-986120 as compared to the B1R inhibitor SSR-240612 (D). sCD13 did not induce platelet aggregation while a PAR4 agonist peptide (Ala-Tyr-Pro-Gly-Lys-Phe-NH<sub>2</sub> trifluoroacetate salt) or thrombin did (E). Thrombin did not induce NETosis (F). Results are expressed as mean +/- SD and p<0.05 was considered significant.

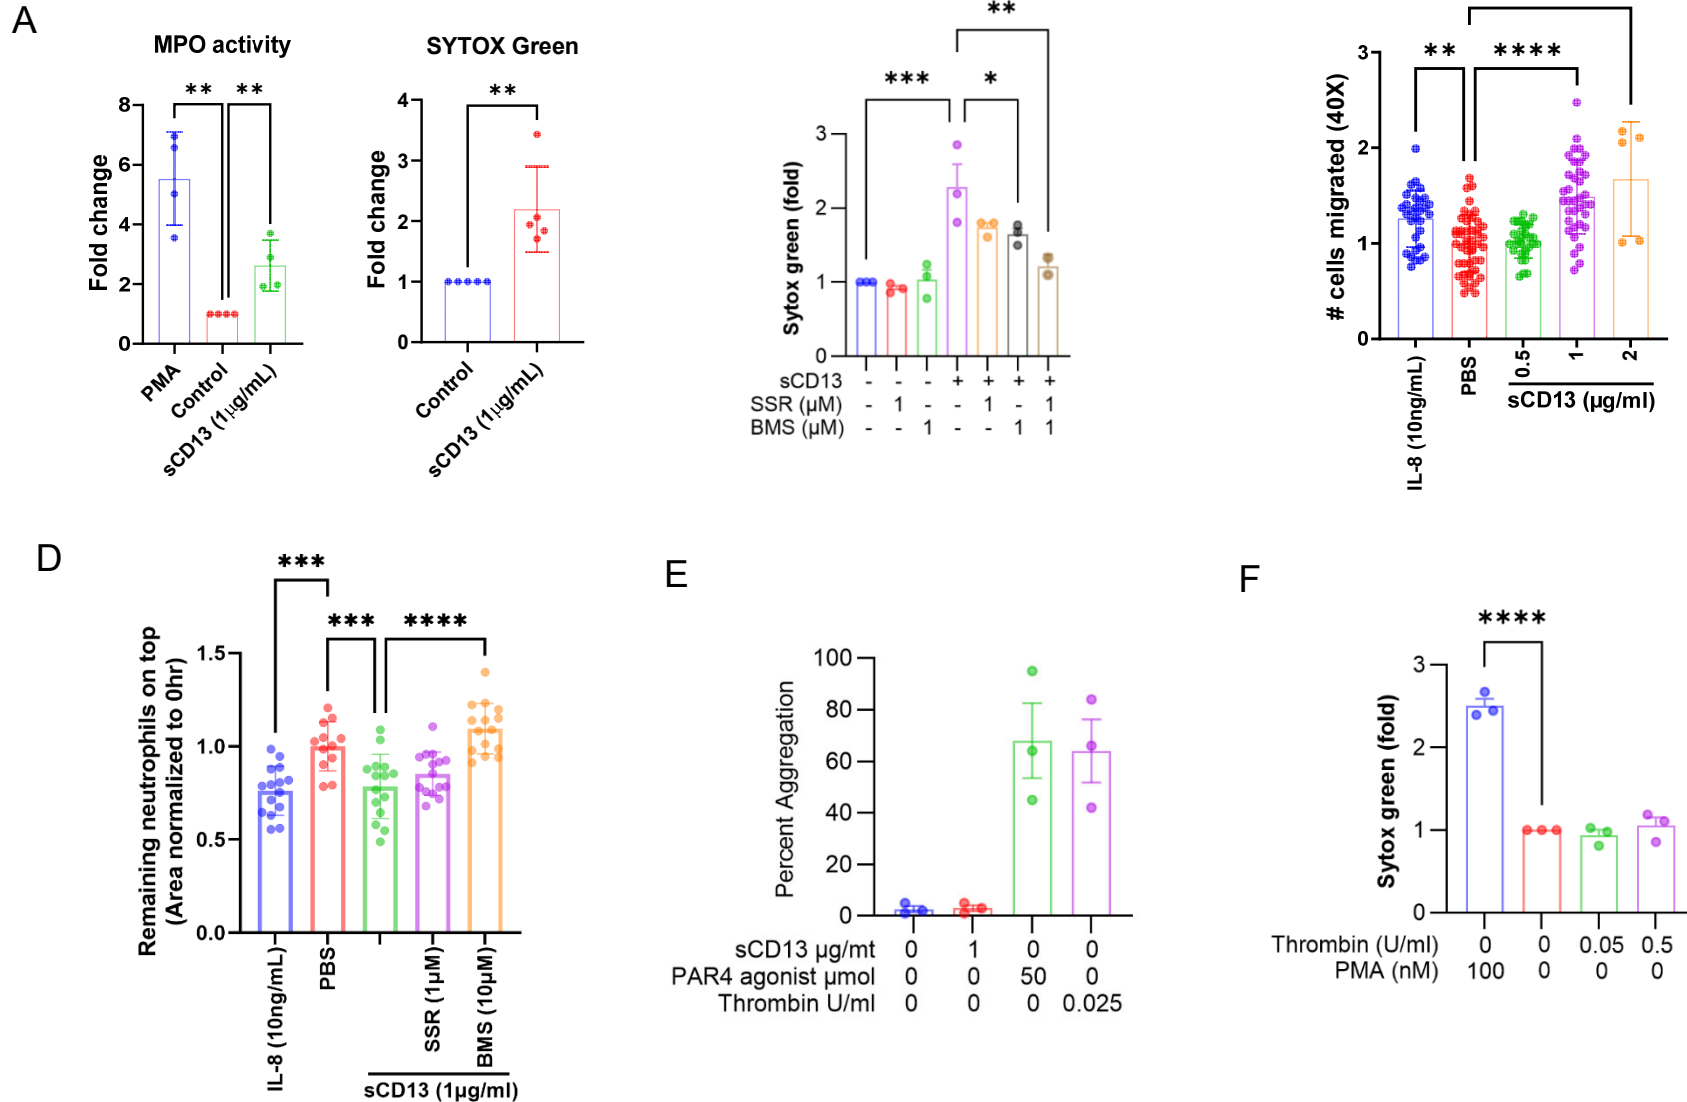

**Supplemental Figure 8.** Immunofluorescence and H&E staining was performed on lung tissues obtained from autopsies performed on patients with cause of death attributed to COVID-19, targeting CD13 (green), neutrophil elastase (red), and nuclear staining DAPI (blue).

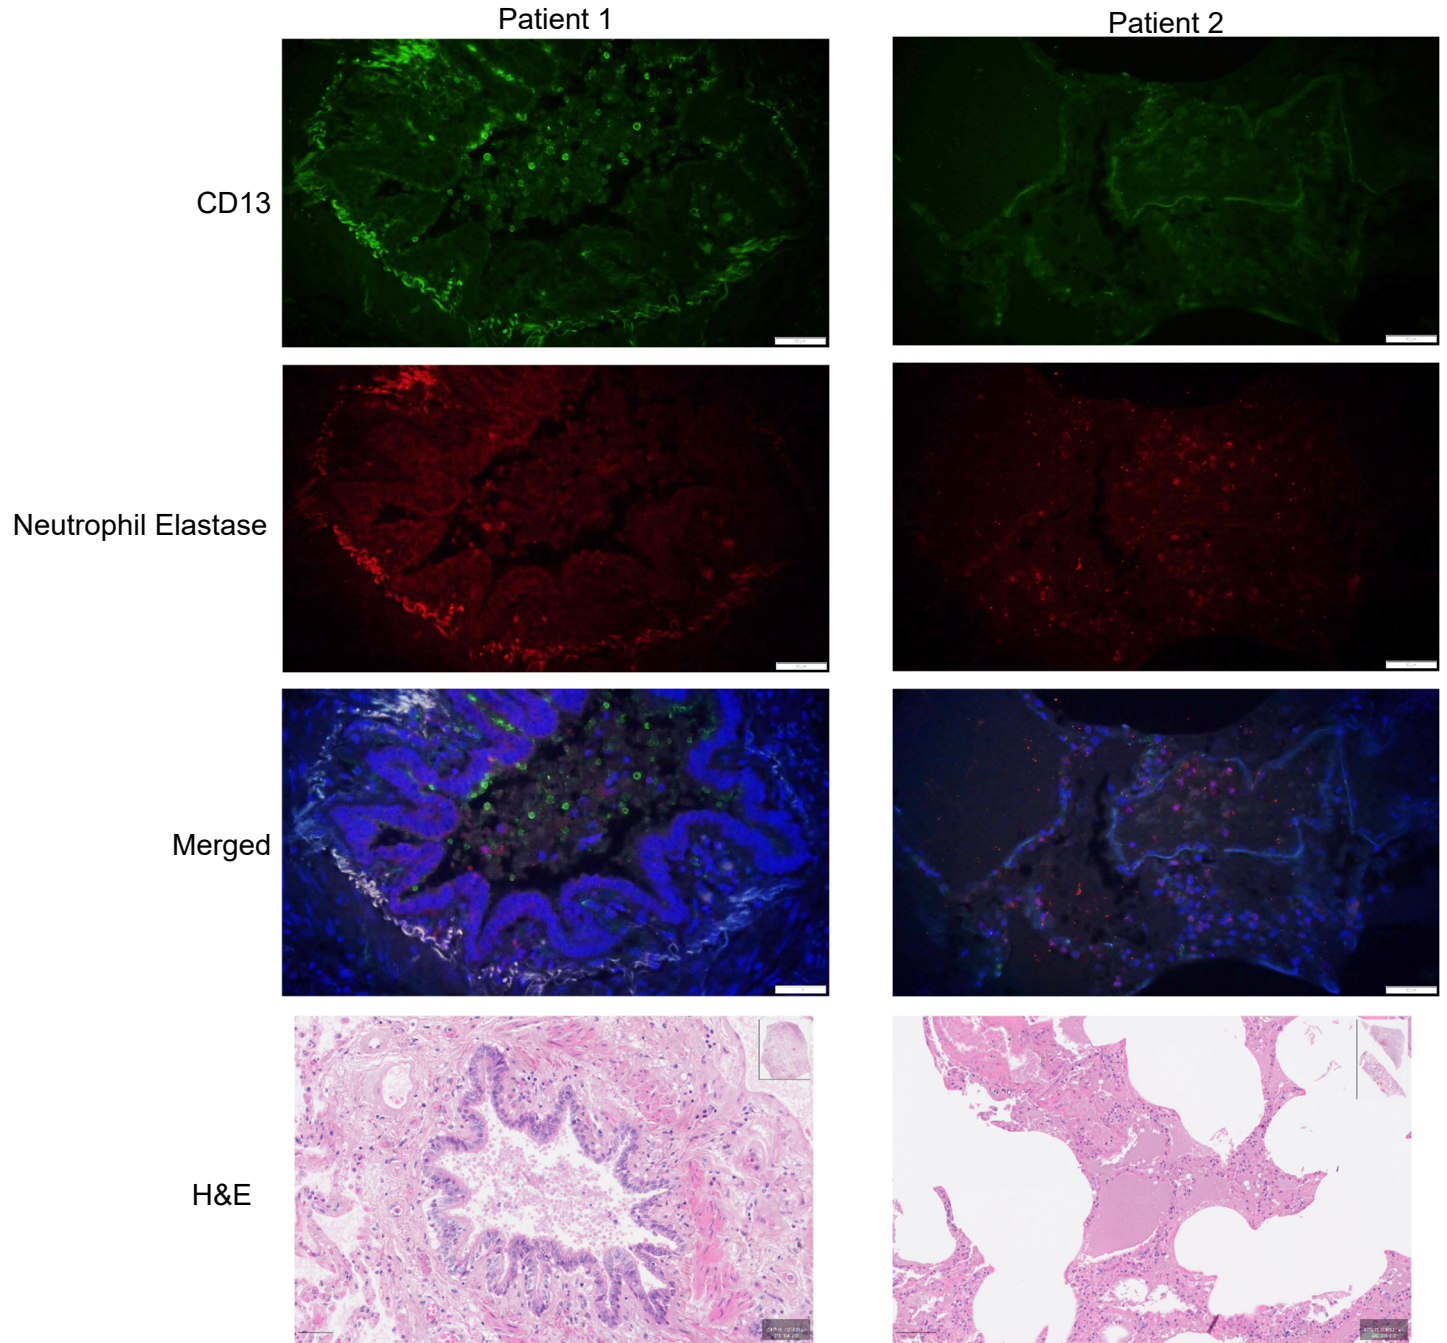

**Supplemental Figure 9.** Single-cell RNA-seq results of nasopharyngeal/pharyngeal swabs, bronchial brushings and bronchial lavages were generated from patients with COVID-19 (n=19) and healthy controls (n=5). Data is extracted from Chua et al. **(A)** UMAP displaying all identified cell types and disease state. **(B)** Both *ANPEP* and *MMP14* are expressed on various epithelial cells and macrophages. *ANPEP* is also expressed on neutrophils while *MMP14* is expressed on mast cells. *BDKRB1* (codes for B1R) is expressed on some epithelial cells with the highest expression on secretory cells and ciliated cells. *F2RL3* (codes for PAR4) was barely detected in this dataset.

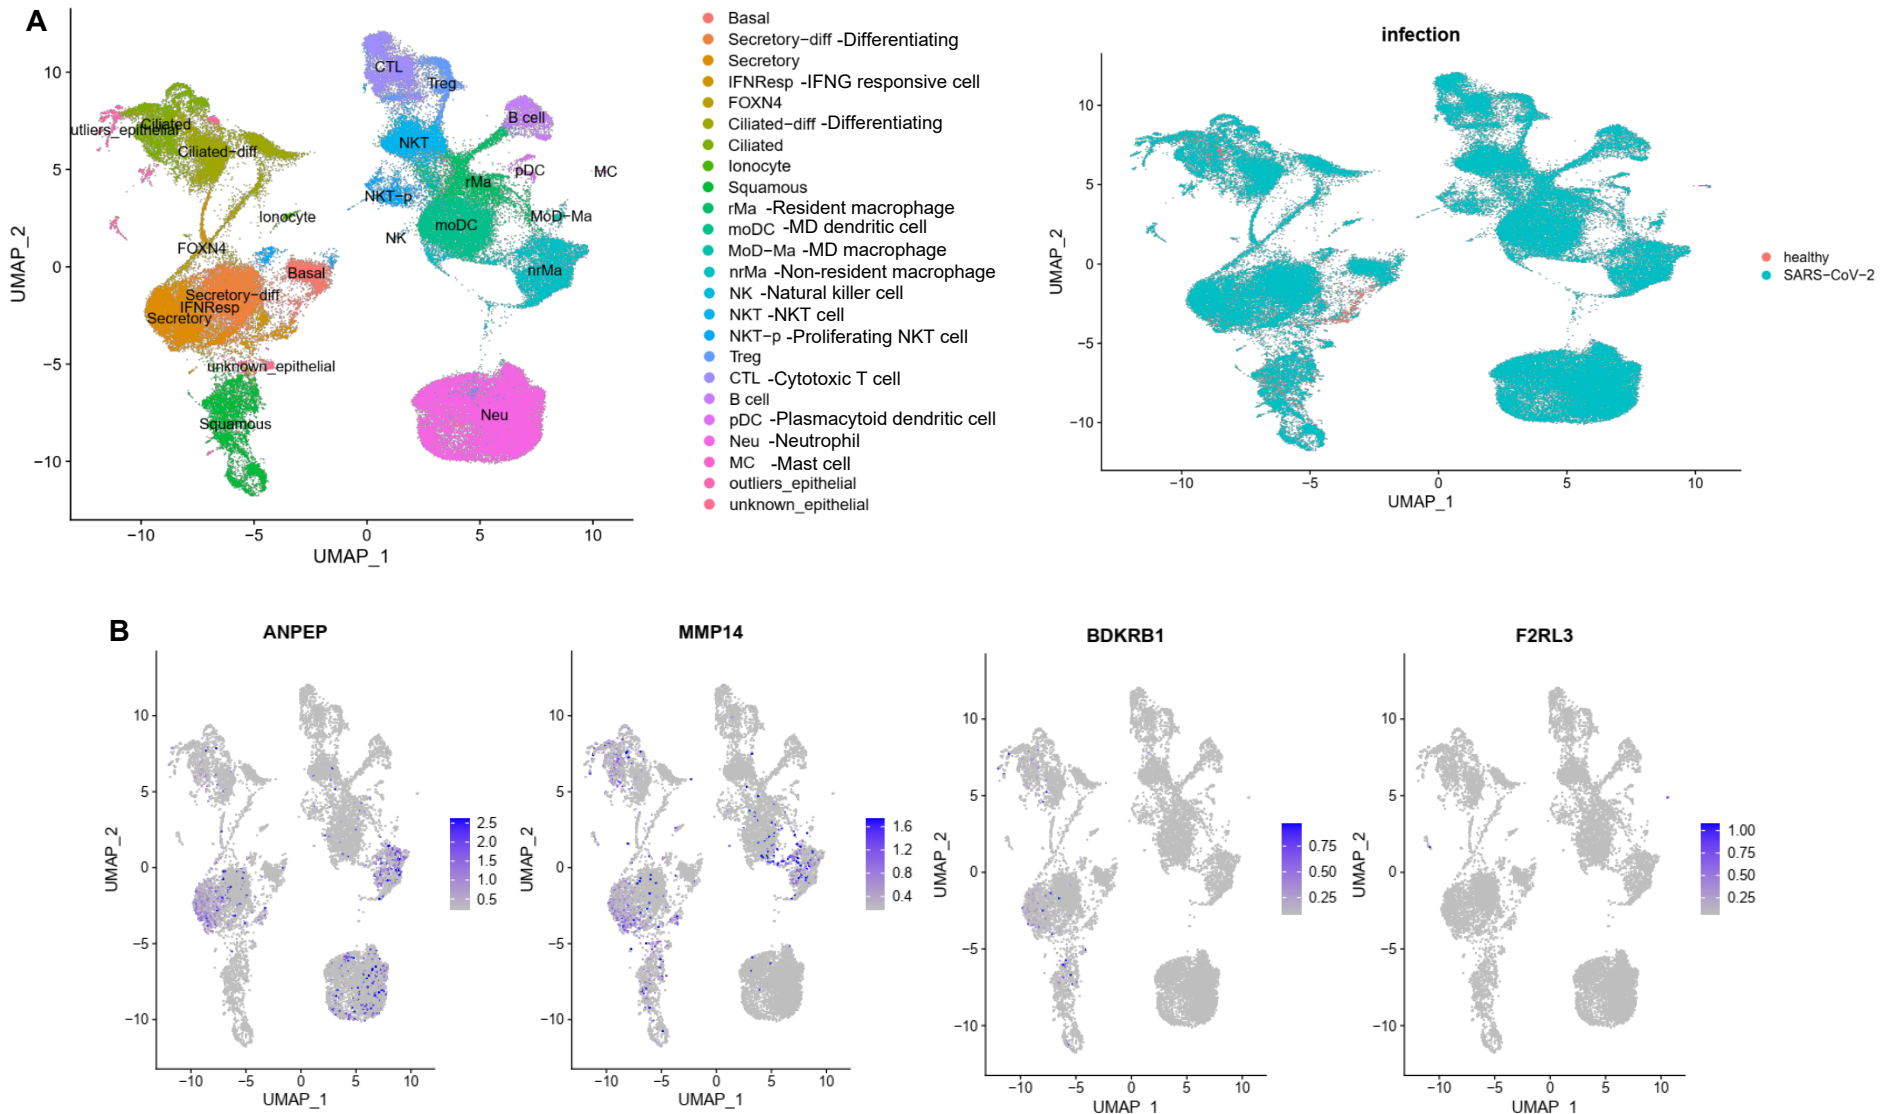

Chua, R.L., Lukassen, S., Trump, S. et al. COVID-19 severity correlates with airway epithelium-immune cell interactions identified by single-cell analysis. *Nat Biotechnol* 38, 970–979 (2020). <https://doi.org/10.1038/s41587-020-0602-4>

**Supplemental Figure 10.** Single-cell RNA-seq results of lung tissues were generated from patients who died with COVID-19 and underwent rapid autopsy (n=19) and non-COVID-19 controls (n=7). Violin plots of *ANPEP*, *MMP14*, *BDKRB1*, and *F2RL3* expression are shown in all identified cell types. Both *ANPEP* and *MMP14* are expressed on various epithelial cells, fibroblasts, NK/T cells, and macrophages/monocytes. *F2RL3* is predominantly expressed on endothelial cells, neuronal cells and smooth muscle cells. *BDKRB1* is expressed on some epithelial cells and fibroblasts. Data is extracted from Melms et al.

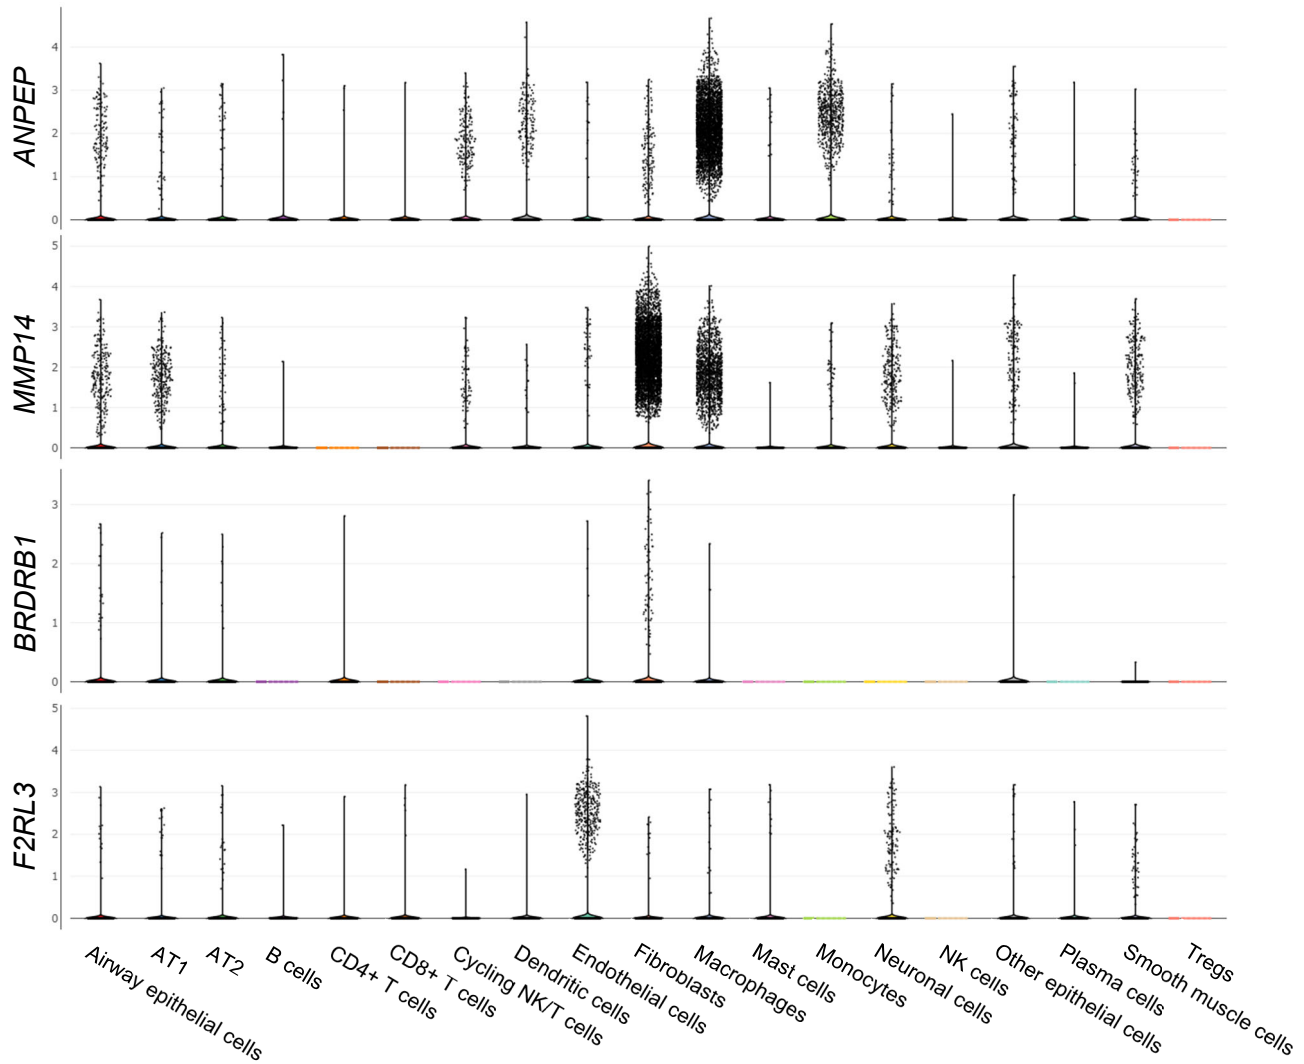

Melms, J.C., Biermann, J., Huang, H. et al. A molecular single-cell lung atlas of lethal COVID-19. *Nature* 595, 114–119 (2021). <https://doi.org/10.1038/s41586-021-03569-1>



D

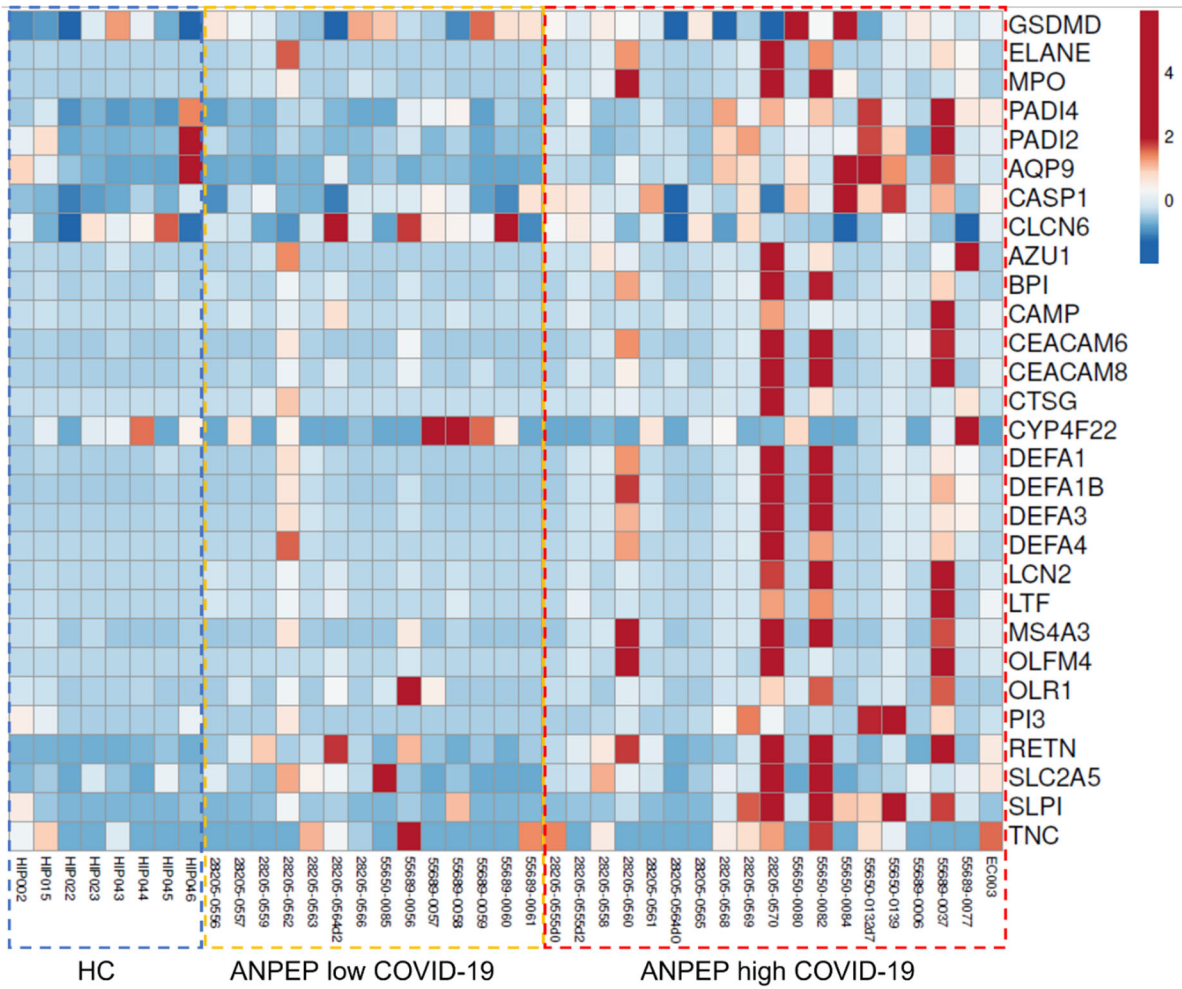

Wilk AJ, Lee MJ, Wei B et al. Multi-omic profiling reveals widespread dysregulation of innate immunity and hematopoiesis in COVID-19. *J Exp Med* 2 August 2021; 218 (8): e20210582. doi: <https://doi.org/10.1084/jem.20210582>

**Supplemental Figure 12.** Reanalysis of single-cell results generated from circulating human neutrophils revealed that immature neutrophils have higher *ANPEP* expression. Data is extracted from Wigerblad et al. **(A)** UMAP displaying all identified neutrophil clusters. **(B)** Heatmap of the top marker genes from each cluster. The cells corresponding to each cluster are grouped, as indicated by the colored bars.

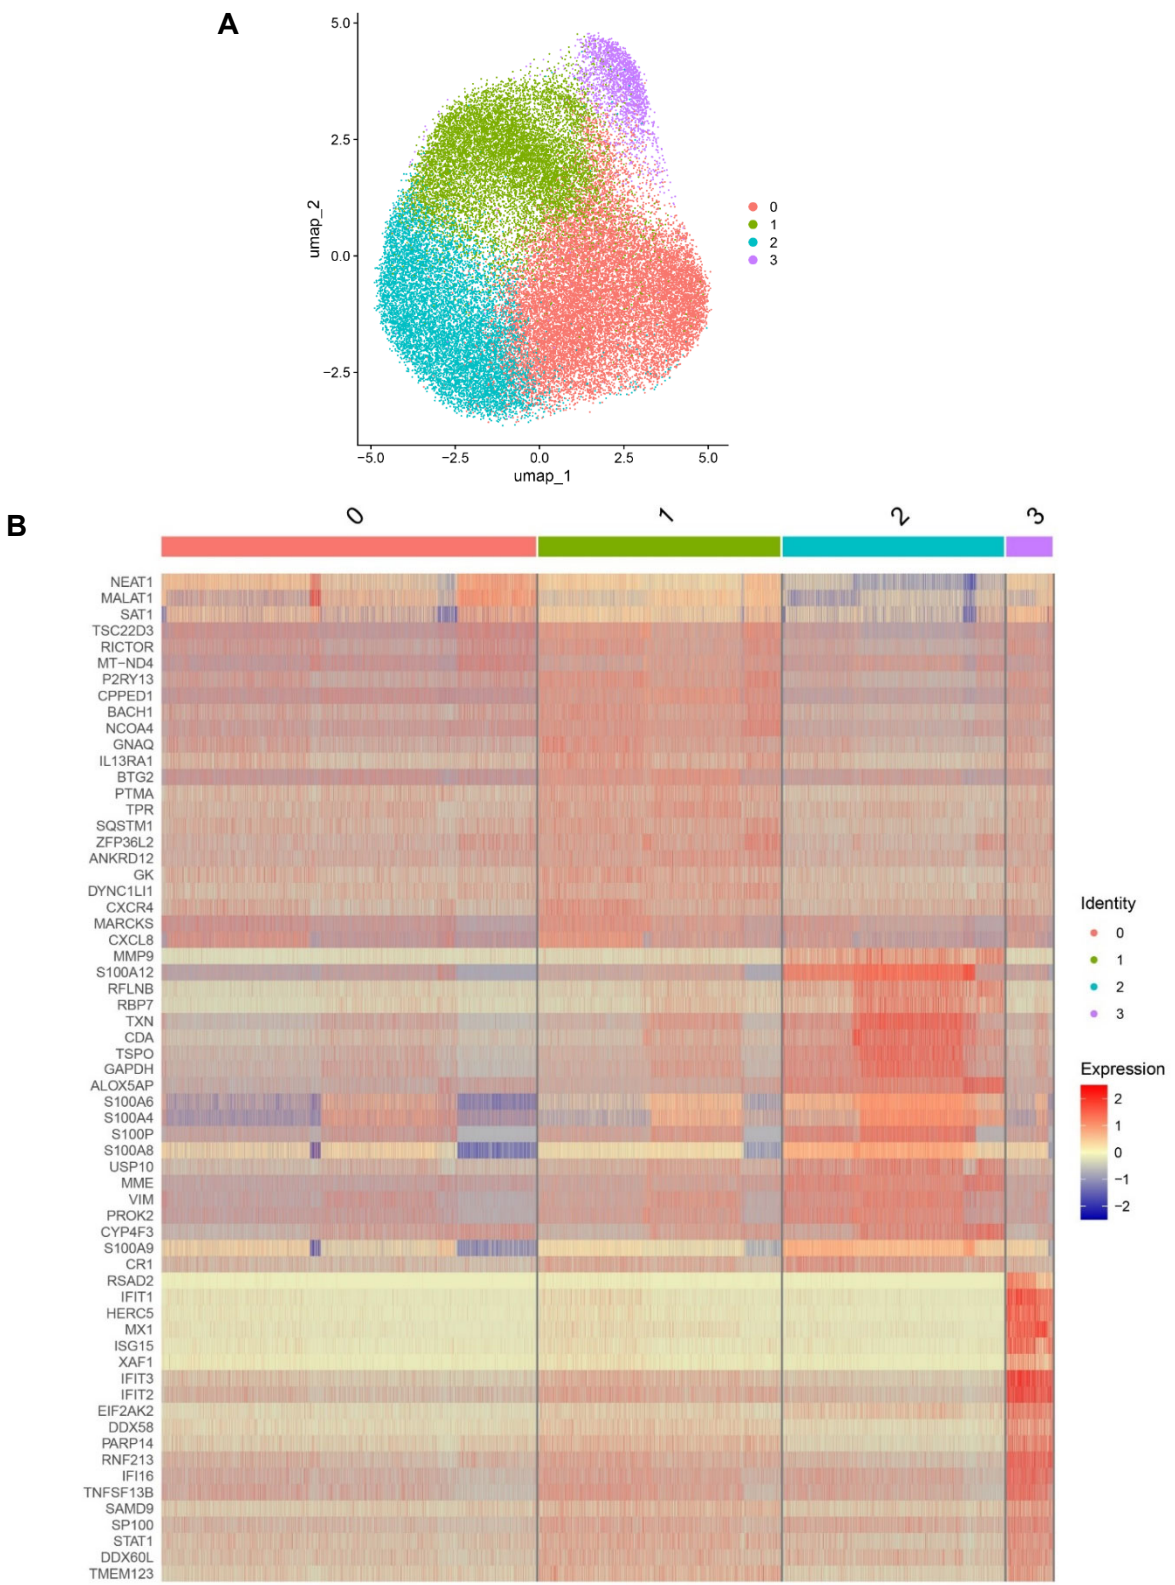

Wigerblad G, Cao Q, Brooks S et al. Single-cell analysis reveals the range of transcriptional states of circulating human neutrophils. *J Immunol.* 2022 Aug 15;209(4):772-782. doi: 10.4049/jimmunol.2200154

**Supplemental Figure 13.** B1R and PAR4 are expressed on cytokine-activated T cells (Tcks). T cells were purified from 3 healthy controls. Cytokine activated T cells were established by stimulating T cells with 25 ng/ml IL-2, 25 ng/ml TNF $\alpha$ , and 100 ng/ml IL-6 in RPMI1640 medium containing 10% fetal bovine serum, 2 mM L-glutamine for 8 days. B1R, and PAR4 expression on CD4<sup>+</sup> and CD8<sup>+</sup> T cells were done by flow cytometry. Results are expressed as mean  $\pm$  SD and  $p < 0.05$  was considered significant. N=3 healthy donors.

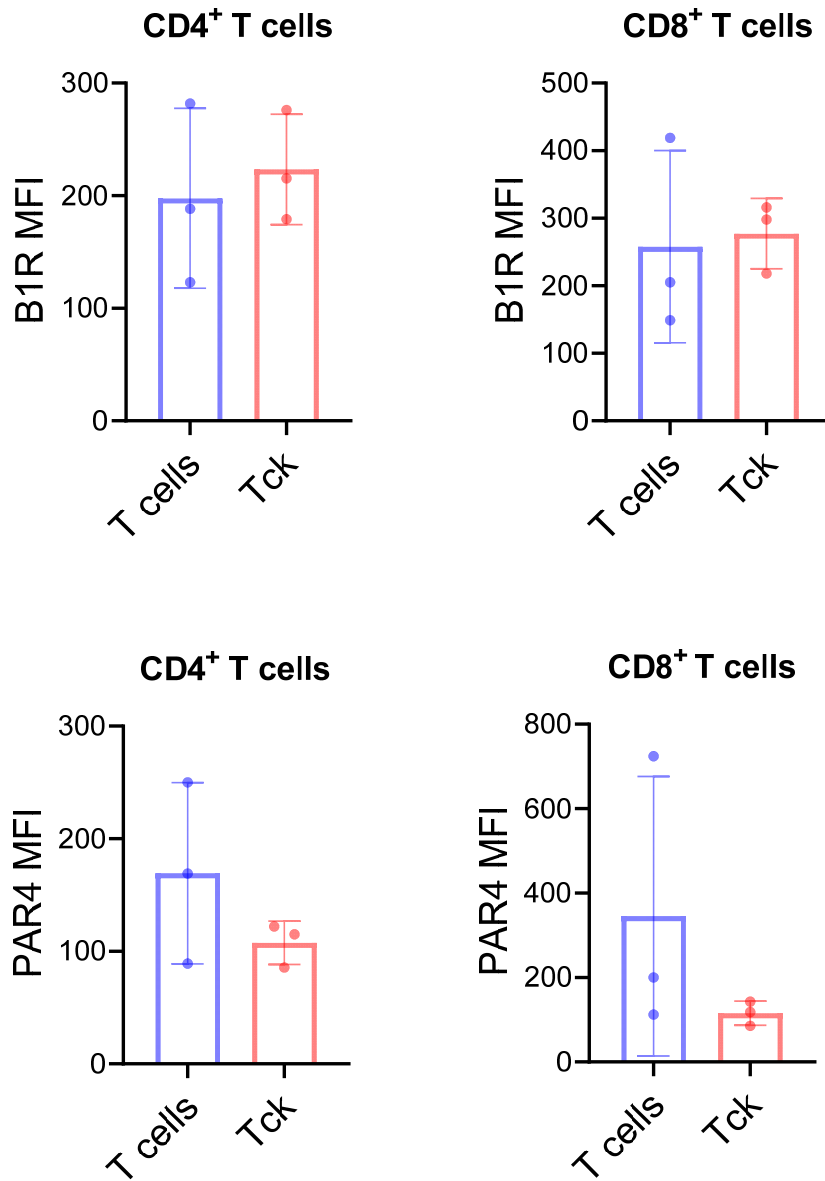

**Supplemental Table 1. Relationships between sCD13 levels, gender, and patient comorbidities**

| Comorbidities                      |                |                |                |                |                |                |                |               |                |              |                |                |               |                |                |                |                   |                |                    |                |
|------------------------------------|----------------|----------------|----------------|----------------|----------------|----------------|----------------|---------------|----------------|--------------|----------------|----------------|---------------|----------------|----------------|----------------|-------------------|----------------|--------------------|----------------|
|                                    | Diabetes       |                | Heart disease  |                | Renal disease  |                | Lung disease   |               | Autoimmune     |              | Cancer         |                | Obesity       |                | Hypertension   |                | Immune deficiency |                | History of smoking |                |
|                                    | -              | +              | -              | +              | -              | +              | -              | +             | -              | +            | -              | +              | -             | +              | -              | +              | -                 | +              | -                  | +              |
| All <sup>†</sup>                   | 979<br>(1202)  | 932<br>(832)   | 976<br>(1002)  | 923<br>(1204)  | 926<br>(1027)  | 1040<br>(1155) | 1030<br>(1173) | 773<br>(677)  | 967<br>(1080)  | 834<br>(779) | 936<br>(1037)  | 1115<br>(1244) | 935<br>(989)  | 984<br>(1139)  | 771<br>(716)   | 1049<br>(1186) | 936<br>(1058)     | 1047<br>(1197) | 908<br>(1005)      | 1106<br>(1218) |
| Male <sup>†</sup>                  | 1037<br>(1250) | 1178<br>(1026) | 1122<br>(1212) | 1055<br>(1094) | 1090<br>(1270) | 1113<br>(990)  | 1180<br>(1255) | 749<br>(562)  | 1113<br>(1180) | 646<br>(624) | 1112<br>(1204) | 940<br>(898)   | 981<br>(1235) | 1238<br>(1080) | 1064<br>(1277) | 1112<br>(1133) | 1089<br>(1150)    | 1210<br>(1425) | 1242<br>(1248)     | 826<br>(956)   |
| Female <sup>†</sup>                | 1000<br>(1090) | 519<br>(472)   | 903<br>(970)   | 452<br>(541)   | 845<br>(958)   | 539<br>(538)   | 720<br>(735)   | 889<br>(1116) | 783<br>(913)   | 804<br>(737) | 774<br>(942)   | 548<br>(586)   | 741<br>(1046) | 817<br>(774)   | 905<br>(864)   | 710<br>(918)   | 798<br>(909)      | 546<br>(662)   | 718<br>(696)       | 1136<br>(1595) |
| P-value<br>(Male<br>vs.<br>Female) | 0.75           | <b>0.001</b>   | 0.32           | 0.056          | 0.41           | 0.064          | 0.068          | 0.83          | 0.072          | 0.76         | 0.062          | 0.87           | 0.34          | 0.076          | 0.71           | 0.055          | 0.11              | 0.53           | <b>0.01</b>        | 0.79           |

<sup>†</sup> sCD13 levels ng/ml: mean (standard deviation)

**Supplemental Table 2. Relationship between sCD13 levels, race, and patient comorbidities**

| Comorbidities                      |                |                |                |                |                |                |                |               |                |               |                |                |                |                |                |                |                   |                |                    |                |
|------------------------------------|----------------|----------------|----------------|----------------|----------------|----------------|----------------|---------------|----------------|---------------|----------------|----------------|----------------|----------------|----------------|----------------|-------------------|----------------|--------------------|----------------|
|                                    | Diabetes       |                | Heart disease  |                | Renal disease  |                | Lung disease   |               | Autoimmune     |               | Cancer         |                | Obesity        |                | Hypertension   |                | Immune deficiency |                | History of smoking |                |
|                                    | -              | +              | -              | +              | -              | +              | -              | +             | -              | +             | -              | +              | -              | +              | -              | +              | -                 | +              | -                  | +              |
| All <sup>†</sup>                   | 979<br>(1202)  | 932<br>(832)   | 976<br>(1002)  | 923<br>(1204)  | 926<br>(1027)  | 1040<br>(1155) | 1030<br>(1173) | 773<br>(677)  | 967<br>(1080)  | 834<br>(779)  | 936<br>(1037)  | 1115<br>(1244) | 935<br>(989)   | 984<br>(1139)  | 771<br>(716)   | 1049<br>(1186) | 936<br>(1058)     | 1047<br>(1197) | 908<br>(1005)      | 1106<br>(1218) |
| Black <sup>†</sup>                 | 1336<br>(1453) | 1101<br>(1029) | 1285<br>(1332) | 1142<br>(1247) | 1330<br>(1429) | 1086<br>(1031) | 1382<br>(1351) | 900<br>(1125) | 1248<br>(1332) | 1188<br>(570) | 1223<br>(1350) | 1405<br>(888)  | 1252<br>(1611) | 1239<br>(1048) | 1259<br>(1480) | 1225<br>(1038) | 1216<br>(1291)    | 1577<br>(1510) | 1215<br>(1266)     | 1324<br>(1423) |
| White <sup>†</sup>                 | 807<br>(829)   | 733<br>(729)   | 804<br>(832)   | 686<br>(610)   | 796<br>(824)   | 737<br>(707)   | 727<br>(795)   | 930<br>(774)  | 807<br>(800)   | 402<br>(547)  | 818<br>(848)   | 605<br>(406)   | 753<br>(757)   | 819<br>(845)   | 877<br>(737)   | 729<br>(118)   | 814<br>(805)      | 401<br>(479)   | 847<br>(817)       | 614<br>(707)   |
| P-value<br>(Black<br>vs.<br>White) | 0.083          | 0.099          | <b>0.02</b>    | 0.60           | <b>0.03</b>    | 0.23           | <b>0.003</b>   | 0.66          | <b>0.045</b>   | 0.07          | 0.07           | <b>0.03</b>    | 0.17           | 0.07           | 0.52           | <b>0.01</b>    | 0.053             | 0.10           | 0.15               | <b>0.02</b>    |

<sup>†</sup> sCD13 levels ng/ml: mean (standard deviation)

**Supplemental Table 3. Subject characteristics of the Weill Cornell Medical College cohort**

|                             | COVID-19 |         | Controls |         |
|-----------------------------|----------|---------|----------|---------|
| <b>Demographics</b>         |          |         |          |         |
| Number                      | 21       |         | 4        |         |
| Age (years)*                | 62 ± 15  | (29-85) | 43 ± 19  | (25-60) |
| Female                      | 5        | (23.8%) | 3        | (75.0%) |
| <b>Clinical Progression</b> |          |         |          |         |
| WHO score                   | 6 ± 2    | (3-8)   |          |         |
| Mild/Moderate/Severe        | 2/9/10   |         |          |         |
| <b>Comorbidities</b>        |          |         |          |         |
| Diabetes                    | 11       | (52.4%) |          |         |
| Hyperlipidemia              | 11       | (52.4%) |          |         |
| Renal disease               | 8        | (38.1%) |          |         |
| Lung disease                | 5        | (23.8%) |          |         |
| Hypertension                | 12       | (57.1%) |          |         |
| <b>Medications</b>          |          |         |          |         |
| Hydroxychloroquine          | 2        | (9.5%)  |          |         |
| Anti-IL6 receptor           | 1        | (4.8%)  |          |         |
| Steroids                    | 17       | (81.0%) |          |         |
| Antiviral                   | 10       | (47.6%) |          |         |
| <b>Respiratory status</b>   |          |         |          |         |
| Room air                    | 2        | (9.5%)  |          |         |
| Nasal cannula               | 8        | (38.1%) |          |         |
| High flow oxygen            | 3        | (14.3%) |          |         |
| Mechanical ventilation      | 8        | (38.1%) |          |         |
| <b>Final outcomes</b>       |          |         |          |         |
| Discharged                  | 13       | (61.9%) |          |         |
| Death                       | 8        | (38.1%) |          |         |

\* Mean ± standard deviation (range or percentage)

**Supplemental Table 4. Subject characteristics of patients with sepsis**

| Characteristics                      | Sepsis group<br>(n = 50) |
|--------------------------------------|--------------------------|
| <b>Age, mean (SD)</b>                | 52 ± 19.3                |
| <b>Male, n (%)</b>                   | 32 (64)                  |
| <b>Race, n (%)</b>                   |                          |
| White                                | 43 (86)                  |
| Black                                | 7 (14)                   |
| <b>Ethnicity, n (%)</b>              |                          |
| Non-Hispanic or Latino               | 46 (92)                  |
| Hispanic or Latino                   | 4 (8)                    |
| <b>Chronic comorbidities, n (%)</b>  |                          |
| Cardiovascular disease               | 19 (38)                  |
| Pulmonary disease                    | 19 (38)                  |
| Renal disease                        | 20 (40)                  |
| Liver disease                        | 15 (30)                  |
| Diabetes                             | 14 (28)                  |
| Malignancy                           | 11 (22)                  |
| <b>Mechanical ventilation, n (%)</b> | 35 (70)                  |
| <b>SOFA score, mean (SD)</b>         | 6.4 ± (3.7)              |
| <b>Hospital mortality, n (%)</b>     | 13 (26)                  |
| <b>Source of sepsis, n (%)</b>       |                          |
| Pulmonary                            | 25 (50)                  |
| Intra-abdominal                      | 18 (36)                  |
| Skin soft tissue                     | 4 (8)                    |
| Urinary                              | 2 (4)                    |
| ENT                                  | 2 (4)                    |
| CNS                                  | 2 (4)                    |
| Pleural                              | 1 (2)                    |
| Blood                                | 2 (4)                    |

**Supplemental Table 5. List of neutrophil-immaturity genes**

|                             |                                                                                                                                                                                                                                                                       |
|-----------------------------|-----------------------------------------------------------------------------------------------------------------------------------------------------------------------------------------------------------------------------------------------------------------------|
| Neutrophil-immaturity genes | AZU1; BPI; CEACAM8; CTSG; DEFA1; DEFA1B; DEFA3; DEFA4; ELANE; LCN2; MPO; MS4A3; SLC2A5; CAMP; CD24; CD24L4; CEACAM6; CYP4F22; LTF; OLFM4; OLR1; PI3 RETN; SLPI; TNC1; EEF1E1; HP; HPR; IGLL1; KIAA0101; KIF11; MMP8; NKG7; PRG2; RNASE3; TARP; TMEM106C; TRGC1; TRGV9 |
|-----------------------------|-----------------------------------------------------------------------------------------------------------------------------------------------------------------------------------------------------------------------------------------------------------------------|
